# Supplementary material for: Glucose and Palmitate Differentially Regulate PFKFB3/iPFK2 and Inflammatory Responses in Mouse Intestinal Epithelial Cells
Source: PubMed Central journal article supplement (PMC4937440; doi:10.1038/srep28963), 2016-07-08
Supplement: srep28963-s1.pdf [file srep28963-s1.pdf]

# Glucose and Palmitate Differentially Regulate *PFKFB3*/iPFK2 and Inflammatory Responses in Mouse Intestinal Epithelial Cells

Rachel Botchlett<sup>1</sup>, Honggui Li<sup>1</sup>, Xin Guo<sup>1</sup>, Ting Qi<sup>1</sup>, JiaJia Zhao<sup>1</sup>, Juan Zheng<sup>1</sup>, Shih-Lung Woo<sup>1</sup>,  
Ya Pei<sup>1</sup>, Mengyang Liu<sup>1</sup>, Xiang Hu<sup>1</sup>, Guang Chen<sup>1</sup>, Ting Guo<sup>1</sup>, Qifu Li<sup>2</sup>, Xiaoqiu Xiao<sup>2,3</sup>,  
Yuqing Huo<sup>4,5\*</sup>, and Chaodong Wu<sup>1\*</sup>

<sup>1</sup> Department of Nutrition and Food Science, Texas A&M University, College Station, TX, 77843, USA

<sup>2</sup> Department of Endocrinology and <sup>3</sup> the Laboratory of Lipid & Glucose Metabolism, the First Affiliated Hospital of Chongqing Medical University, Chongqing 400016, China

<sup>4</sup> Vascular Biology Center, Department of Cellular Biology and Anatomy, Medical College of Georgia, Augusta University, Augusta, GA 30912, USA

<sup>5</sup> Drug Discovery Center, Key Laboratory of Chemical Genomics, Peking University Shenzhen Graduate School, Shenzhen 518055, China

**Running Title:** Intestinal *PFKFB3* and inflammatory responses

**Key words:** glucose; palmitate; intestinal epithelial cells; *PFKFB3*; obesity; inflammatory response

**Correspondence:** Chaodong Wu, MD, PhD, College Station, TX 77843; Fax: 979 862 7782;

Email: [cdwu@tamu.edu](mailto:cdwu@tamu.edu); Yuqing Huo, MD, PhD, Augusta, GA 30912; Fax: (706) 721-9799;

Email: [YHUO@augusta.edu](mailto:YHUO@augusta.edu)

**SUPPLEMENTAL TABLE 1** Macro- and micronutrient composition of low-fat and high-fat diets.

|                    | LFD  |       | HFD  |       |
|--------------------|------|-------|------|-------|
| Macronutrients     | g%   | kCal% | g%   | kCal% |
| Protein            | 19.2 | 20    | 26   | 20    |
| Carbohydrates      | 67.3 | 70    | 26   | 20    |
| Fat                | 4.3  | 10    | 35   | 60    |
| TOTAL              |      | 100   |      | 100   |
| kCal/ g            | 3.85 |       | 5.24 |       |
|                    |      |       |      |       |
| Ingredients        |      |       |      |       |
| Casein             | 200  | 800   | 200  | 800   |
| Corn Starch        | 315  | 1260  | 0    | 0     |
| Sucrose            | 350  | 1400  | 68.8 | 275   |
| Cellulose          | 50   | 0     | 50   | 0     |
| Soybean Oil        | 25   | 225   | 25   | 225   |
| Lard               | 20   | 180   | 245  | 2205  |
| Mineral Mix S10026 | 10   | 0     | 10   | 0     |
| Vitamin MixV10001  | 10   | 40    | 10   | 40    |
